# Supplementary material for: Reduced Gonadotrophin Receptor Expression Is Associated with a More Aggressive Ovarian Cancer Phenotype
Source: Int J Mol Sci. 2020 Dec 23;22(1):71. doi: 10.3390/ijms22010071 (PMC7793521; doi:10.3390/ijms22010071)
Supplement: Supplementary file 1 [file ijms-22-00071-s001.pdf]

**Table S1.** Clinicopathological characteristics of the high serous ovarian cancer TMA cohort.

| <b>Serous ovarian carcinomas (n=144)</b> |                      |            |
|------------------------------------------|----------------------|------------|
| Age at diagnosis (years)                 | Median (range)       | 61 (24-87) |
| Histological grade                       | Moderate             | 22         |
|                                          | Poor                 | 122        |
| FIGO stage                               | Stage II             | 2          |
|                                          | Stage III            | 134        |
|                                          | Stage IV             | 8          |
| Residual disease after surgery           | No                   | 21         |
|                                          | Yes                  | 81         |
|                                          | Unknown              | 42         |
| FSHR immunoreactive score                | ≤2                   | 39         |
|                                          | ≥3                   | 73         |
|                                          | Lost/unstained cores | 32         |
| LHCGR immunoreactive score               | ≤2                   | 82         |
|                                          | ≥3                   | 38         |
|                                          | Lost/unstained cores | 24         |
| Recurrence                               | No                   | 30         |
|                                          | Yes                  | 99         |
|                                          | Unknown              | 15         |
| Cause of death                           | Ovarian cancer       | 87         |
|                                          | Other cause          | 14         |
|                                          | Alive                | 41         |
|                                          | Lost to follow-up    | 2          |

**Table S2.** Clinicopathological characteristics of benign and high grade serous ovarian cancer cohort used in the Fluidigm qRT-PCR

|                                                    |                |            |
|----------------------------------------------------|----------------|------------|
| <b>Benign serous cystadenomas (n=17)</b>           |                |            |
| Age                                                | Median (range) | 60 (25-75) |
| <b>High grade serous ovarian carcinomas (n=29)</b> |                |            |
| Age at Diagnosis                                   | Median (range) | 59 (38-84) |
| Histological Grade                                 | Moderate       | 1          |
|                                                    | Poor           | 28         |
| FIGO stage                                         | Stage I        | 4          |
|                                                    | Stage II       | 8          |
|                                                    | Stage III      | 17         |

**Table S3.** Summary of FSHR and LHCGR antibodies used for immunohistochemistry and western blotting

| Antibody           | Source                     | Immunogen                                 | Clonality  | Dilution (IHC) | Dilution (WB) | Description |
|--------------------|----------------------------|-------------------------------------------|------------|----------------|---------------|-------------|
| FSHR 323           | In-house <sup>26, 29</sup> | Fusion protein amino acids 172-358        | Monoclonal | 1/300          | 1/600         | IgG, mouse  |
| FSHR (H-190)       | Santa Cruz (sc-13935)      | Peptide amino acids 1-190                 | Polyclonal | -              | 1/400         | IgG, rabbit |
| LHCGR (H-50)       | Santa Cruz (sc-25828)      | Peptide amino acids 28-77                 | Polyclonal | 1/200          | 1/400         | IgG, rabbit |
| LHCGR (LS-C334599) | Sapphire Bioscience        | Recombinant protein of human <i>LHCGR</i> | Polyclonal | -              | 1/1000        | IgG, rabbit |

**Table S4.** *FSHR* and *LHCGR* siRNA used for knockdown studies

| siRNA (Ambion), 10nM | ID#   | Lot#     | Target exons |
|----------------------|-------|----------|--------------|
| <i>FSHR</i> A        | s5377 | AS02B123 | 7/8          |
| <i>FSHR</i> B        | s5379 | AS02B124 | 7/8          |
| <i>LHCGR</i> A       | s8163 | AS02B125 | 2            |
| <i>LHCGR</i> B       | s8164 | AS02BBRO | 11           |

**Table S5.** Relationship between FSHR and LHCGR expression with clinicopathological parameters

|                               | <b>Low FSHR</b><br><b>IR &lt;3</b> | <b>High FSHR</b><br><b>IR ≥3</b> | <b>Low LHCGR</b><br><b>IR &lt;3</b> | <b>High LHCGR</b><br><b>IR ≥3</b> |
|-------------------------------|------------------------------------|----------------------------------|-------------------------------------|-----------------------------------|
| <b>Age</b>                    |                                    |                                  |                                     |                                   |
| <55                           | 13/39 (33%)                        | 26/39 (67%)                      | 30/42 (71%)                         | 12/42 (29%)                       |
| ≥55                           | 24/71 (34%)                        | 47/71 (66%)                      | 53/77 (69%)                         | 24/77 (31.0%)                     |
| Chi-squared test <sup>a</sup> | <i>p</i> = 1.000                   |                                  | <i>p</i> = 0.837                    |                                   |
| <b>Tumor stage</b>            |                                    |                                  |                                     |                                   |
| FIGO STAGE II                 | 1/2 (50%)                          | 1/2 (50%)                        | 1/2 (50%)                           | 1/2 (50%)                         |
| FIGO stage III                | 35/106 (33%)                       | 71/106 (67%)                     | 78/114 (68%)                        | 36/114 (32%)                      |
| FIGO stage IV                 | 3/4 (75%)                          | 1/4 (25%)                        | 4/5 (80%)                           | 1/5 (20%)                         |
| Chi-squared test              | <i>p</i> = 0.202                   |                                  | <i>p</i> = 0.732                    |                                   |
| <b>Tumor grade</b>            |                                    |                                  |                                     |                                   |
| Moderate                      | 7/17 (41%)                         | 10/17 (59%)                      | 16/19 (84%)                         | 3/19 (16%)                        |
| Poor                          | 32/95 (34%)                        | 63/95 (66%)                      | 67/102 (66%)                        | 35/102 (34%)                      |
| Chi-squared test <sup>a</sup> | <i>P</i> = 0.587                   |                                  | <i>P</i> = 0.177                    |                                   |
| <b>Residual disease</b>       |                                    |                                  |                                     |                                   |
| No                            | 4/16 (25%)                         | 12/16 (75%)                      | 9/19 (47%)                          | 10/19 (53%)                       |
| Yes                           | 20/70 (29%)                        | 50/70 (71%)                      | 58/74 (78%)                         | 16/74 (22%)                       |
| Chi-squared test <sup>a</sup> | <i>P</i> = 0.837                   |                                  | <b><i>P</i> = 0.01</b>              |                                   |

Fishers's exact test

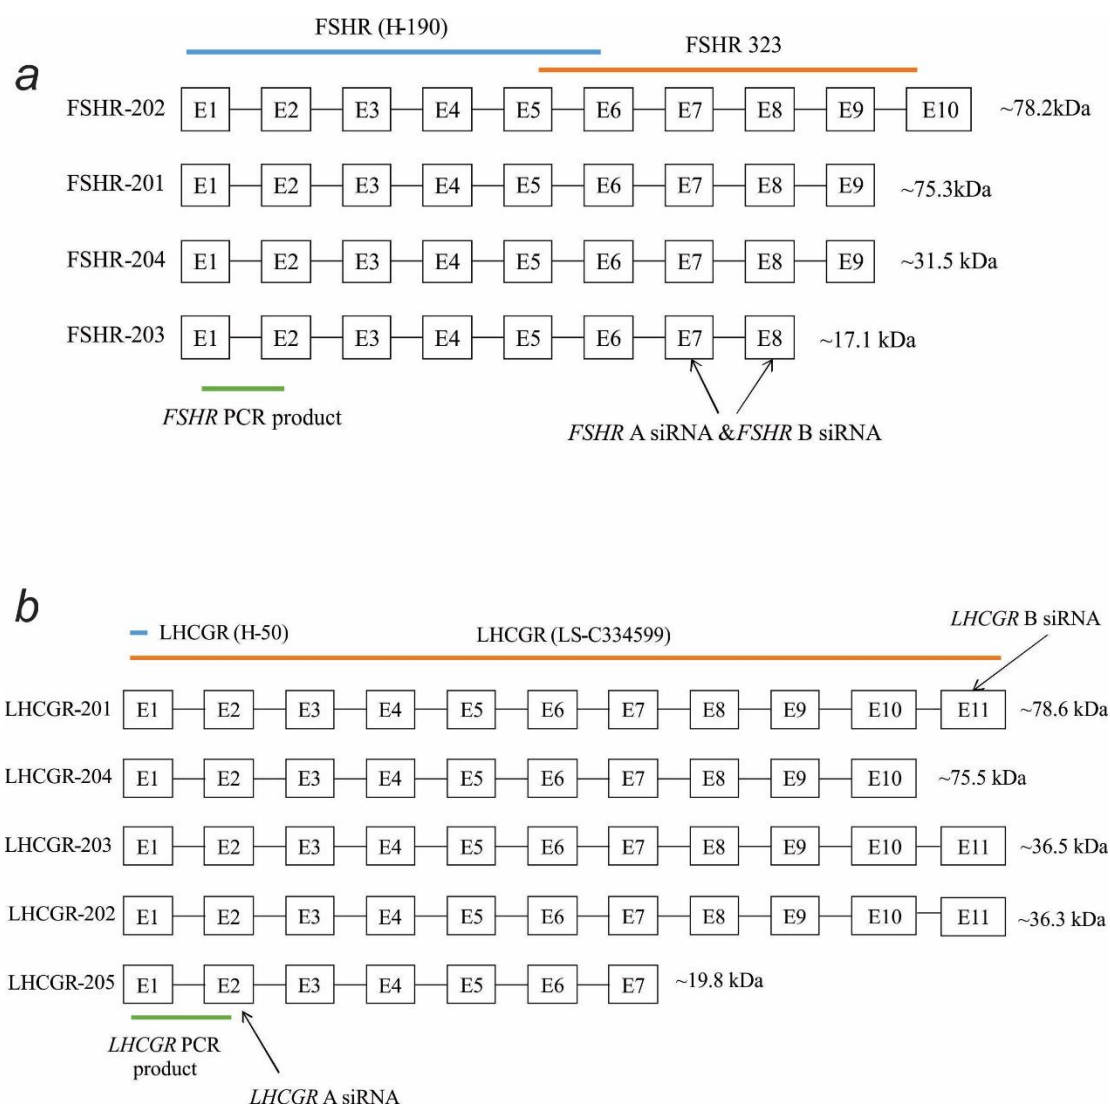

**Figure S1. Human *FSHR* and *LHCGR* splice variants.** E# refers to the exon number, not drawn to scale.. (a) *FSHR* siRNA target exons indicated by arrows. *FSHR* H-190 antibody target region shown by blue line. *FSHR* 323 antibody target region shown by red line. *FSHR* (Hs00174865\_m1) qRT-PCR primer location shown by green line. *FSHR* sequences from *FSHR* Ensembl and NCBI reference sequence NM\_000145.3. *FSHR*-203 is not protein coding (nonsense mediated decay) (b) *LHCGR* siRNA target exons indicated by arrows. *LHCGR* H-50 antibody target region shown by blue line. *LHCGR* LS-C334599 antibody target region shown by red line. *LHCGR* (Hs00896336\_m1) qRT-PCR primer location shown by green line. *LHCGR* sequences from *LHCGR* Ensembl and NCBI reference sequence NM\_000233.3. (<https://asia.ensembl.org/index.html>)

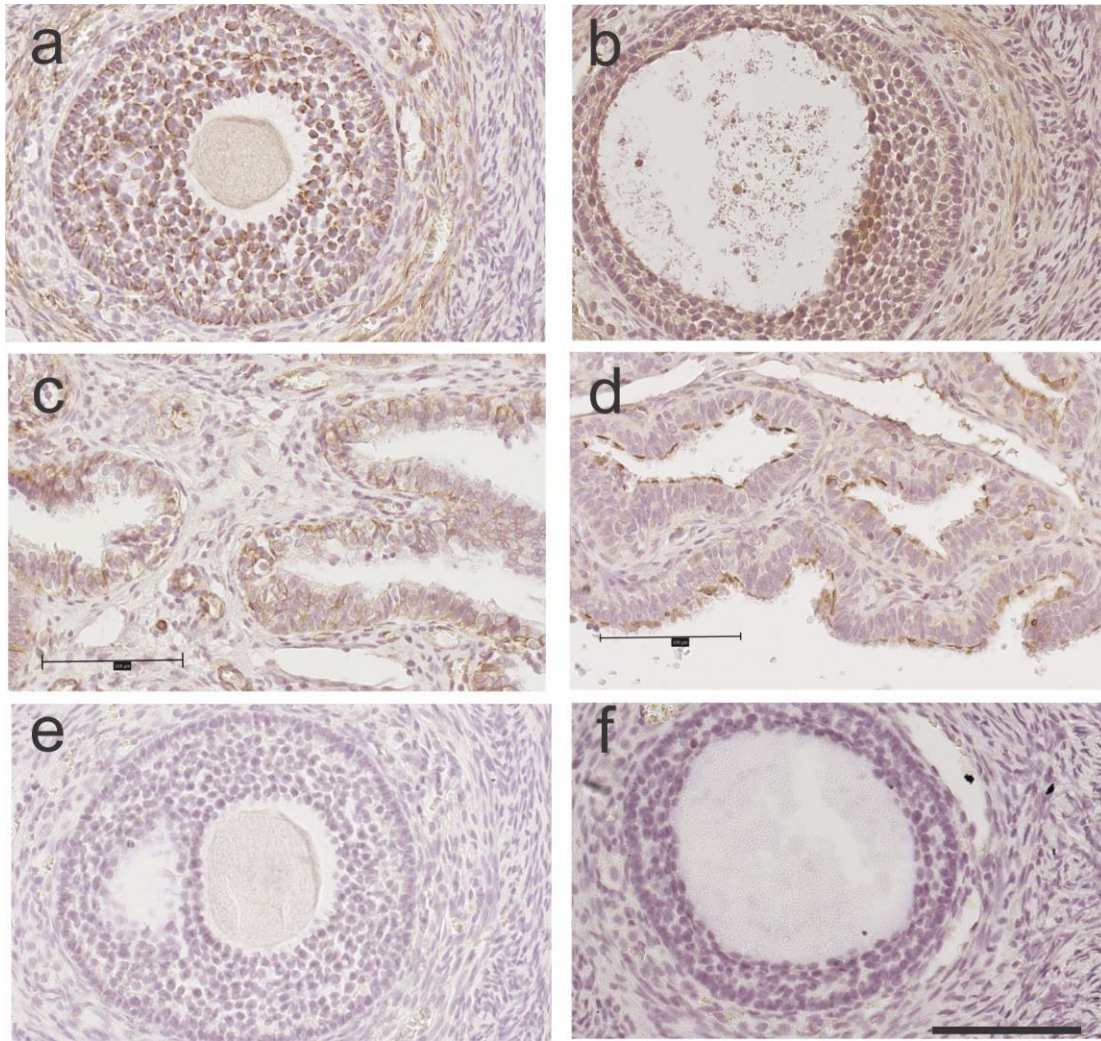

**Figure S2. Follicle-stimulating hormone receptor (FSHR) and luteinising hormone receptor (LHCGR) expression in human ovary.** (a) FSHR in normal ovary (FSHR 323 antibody, 1/300 obtained from Prof Ghinea [26]). (b) LHCGR in normal ovary and Fallopian tube (LHCGR H-50, 1/200, Santa Cruz). (c) FSHR in Fallopian tube (FSHR 323 antibody, 1/300). (d). LHCGR in Fallopian tube (LHCGR H-50, 1/200, Santa Cruz). (e) ovary with mouse IgG (3 $\mu$ g/ml) and (f) ovary with rabbit IgG (1 $\mu$ g/ml). Scale bar=100 $\mu$ m (all images the same magnification).

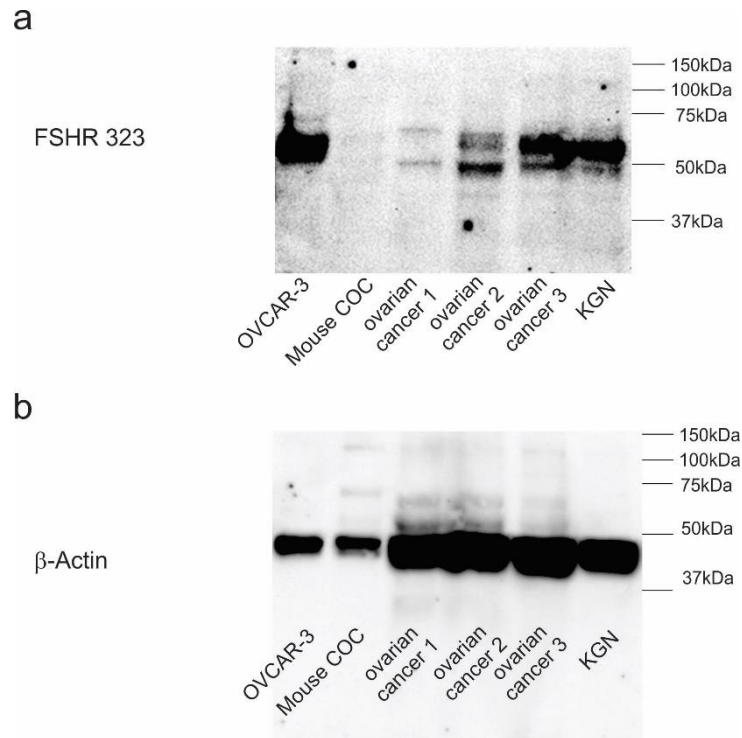

**Figure S3. Western blot using FSHR323 antibody** a) Protein extracts from cell lines (OVCAR3 and KGN, ~40 $\mu$ g) and ovarian cancer tissue extracts (~5 $\mu$ g) were electrophoresed and immunoblotted with FSHR323 (1/600) antibody. b)  $\beta$ -actin (1/2000, Abcam) was used as a loading control. FSHR bands were detected at ~50kDa and ~65kDa.

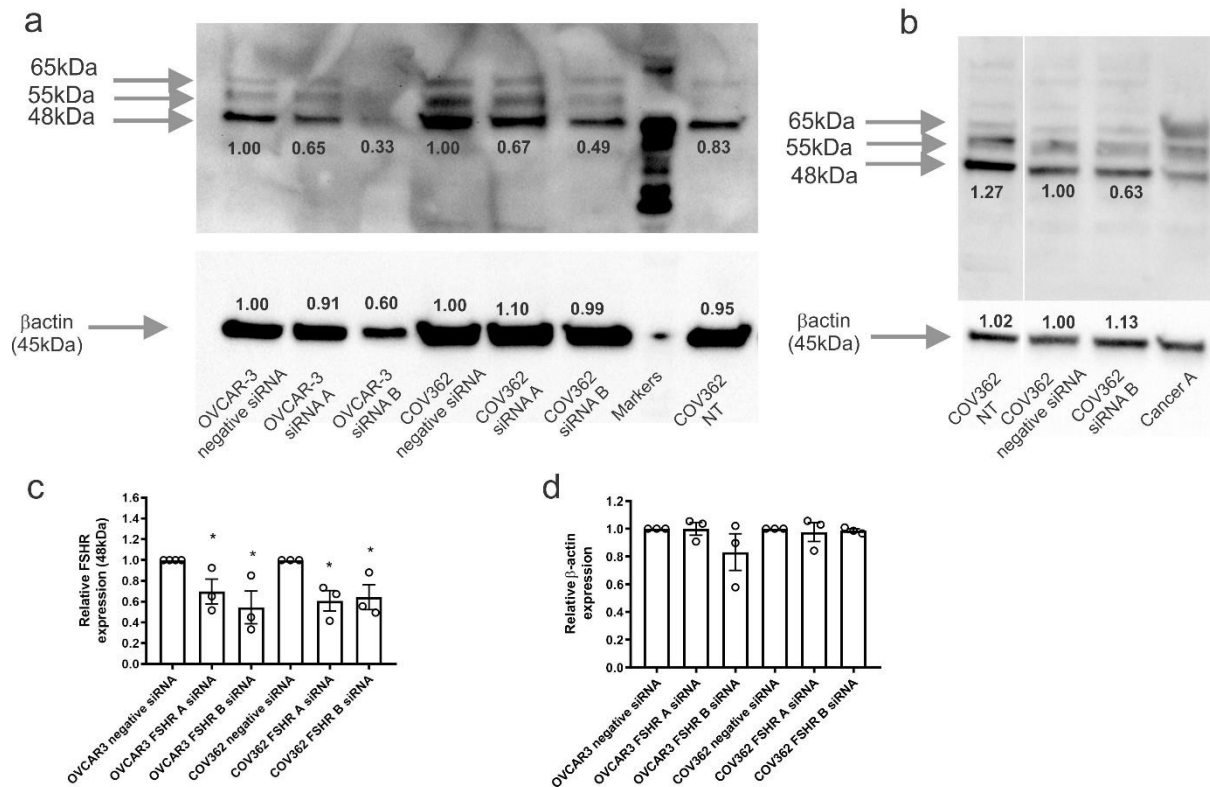

**Figure S4. Effect of follicle-stimulating hormone receptor (FSHR) siRNA treatment on FSHR protein expression in OVCAR3 and COV362 cells. (a)** Western blot following FSHR A and B siRNA treatment with FSHR (H-190) and  $\beta$ -actin antibodies in OVCAR3 and COV362 cells.  $\sim 40\mu\text{g}$  of protein for cell lines and  $\sim 5\mu\text{g}$  protein from ovarian cancer tissue extract were run on a 4-20% TGX gel and incubated with rabbit polyclonal antibodies FSHR H-190 (1/400, Santa Cruz) and  $\beta$ -actin (1/2,000, Abcam cat Ab8227). Numbers below protein bands are fold changes relative to the negative siRNA control treatment. **(b)** FSHR quantitation (48kDa) in FSHR A and B siRNA treated OVCAR3 and COV362 cells compared to the negative siRNA control treated cells. Data is from 3 independent experiments. Statistical significance was determined using the Student's t-test for the experiments on COV362 cells,  $*p < 0.05$ . **(c)** FSHR and **(d)**  $\beta$ -actin expression in FSHR A and B siRNA treated OVCAR3 and COV362 cells compared to the negative siRNA control treated cells

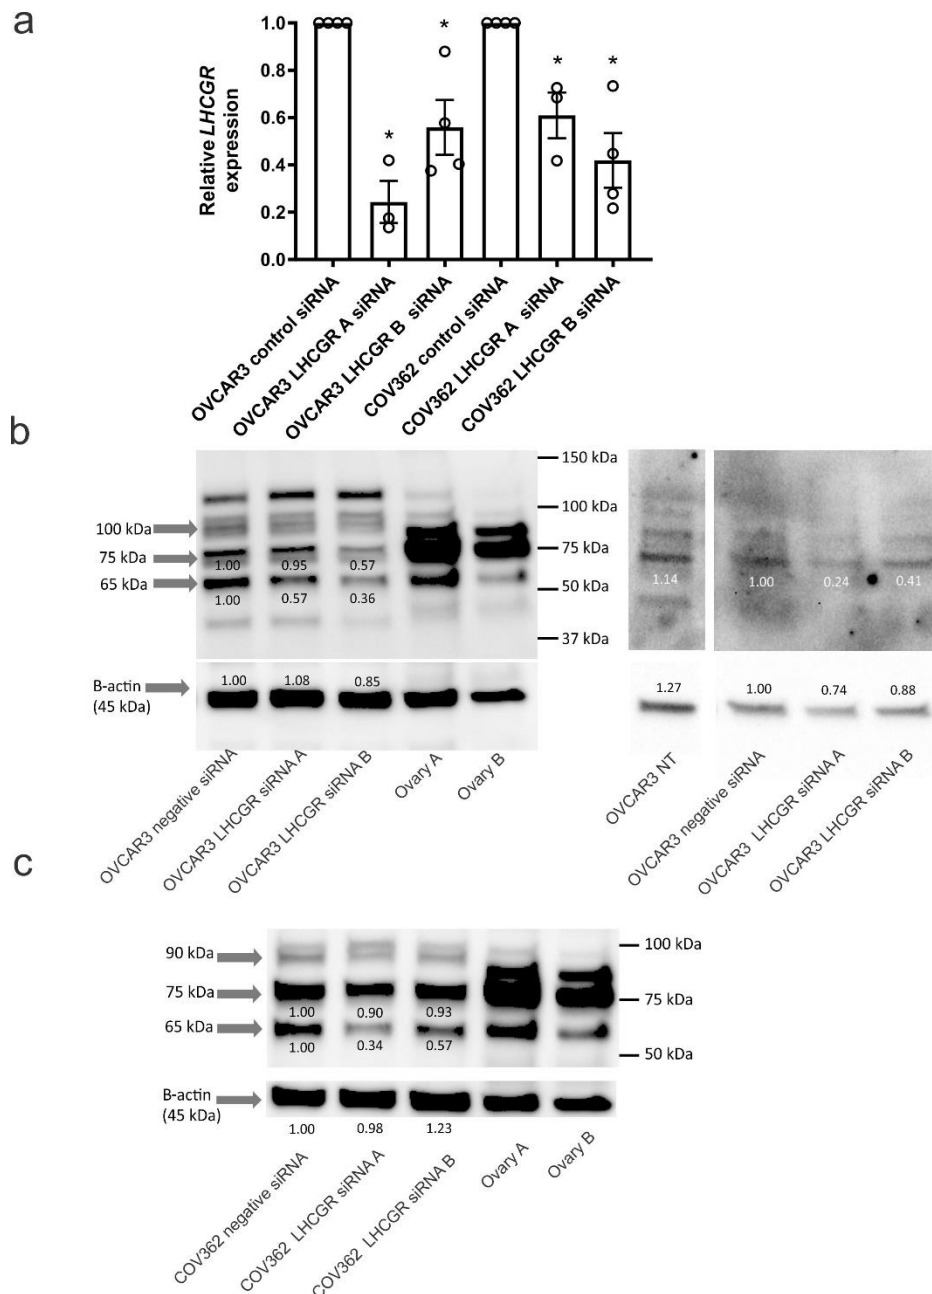

**Figure S5. Effect of luteinising hormone receptor (*LHCGR*) siRNA treatment on *LHCGR* mRNA and protein expression in OVCAR3 and COV362 cells. (a) *LHCGR* expression was quantified using the  $2^{-\Delta\Delta CT}$  method and normalised to housekeeping gene  $\beta$ -actin using negative siRNA control treatment as a calibrator. Data is from 3 to 4 independent experiments performed in triplicate (n=9 to n=12). Statistical significance from negative siRNA control treatment was determined using the Student's t-test, \* $p < 0.05$ . Western blots for *LHCGR* expression following *LHCGR* A and B siRNA treatment in (b) OVCAR3 cells and (c) COV362 cells. Protein extracts (~40  $\mu$ g for OVCAR3 and COV362 & ~2  $\mu$ g for the normal ovary tissues) were run on a 4-20% TGX gel and incubated with rabbit polyclonal antibodies *LHCGR* LS-C334599 (1/1000, Sapphire Bioscience) and  $\beta$ -actin (1/2,000, Abcam cat Ab8227). Human ovary extracts were from pre-menopausal women. Numbers below protein bands are fold changes relative to the negative siRNA control treatment.**
